# Supplementary material for: Clinical evaluation of antiseptic mouth rinses to reduce salivary load of SARS-CoV-2
Source: PubMed Central journal article supplement (PMC8695582; doi:10.1038/s41598-021-03461-y), 2021-12-22

# Supplementary Figure 1

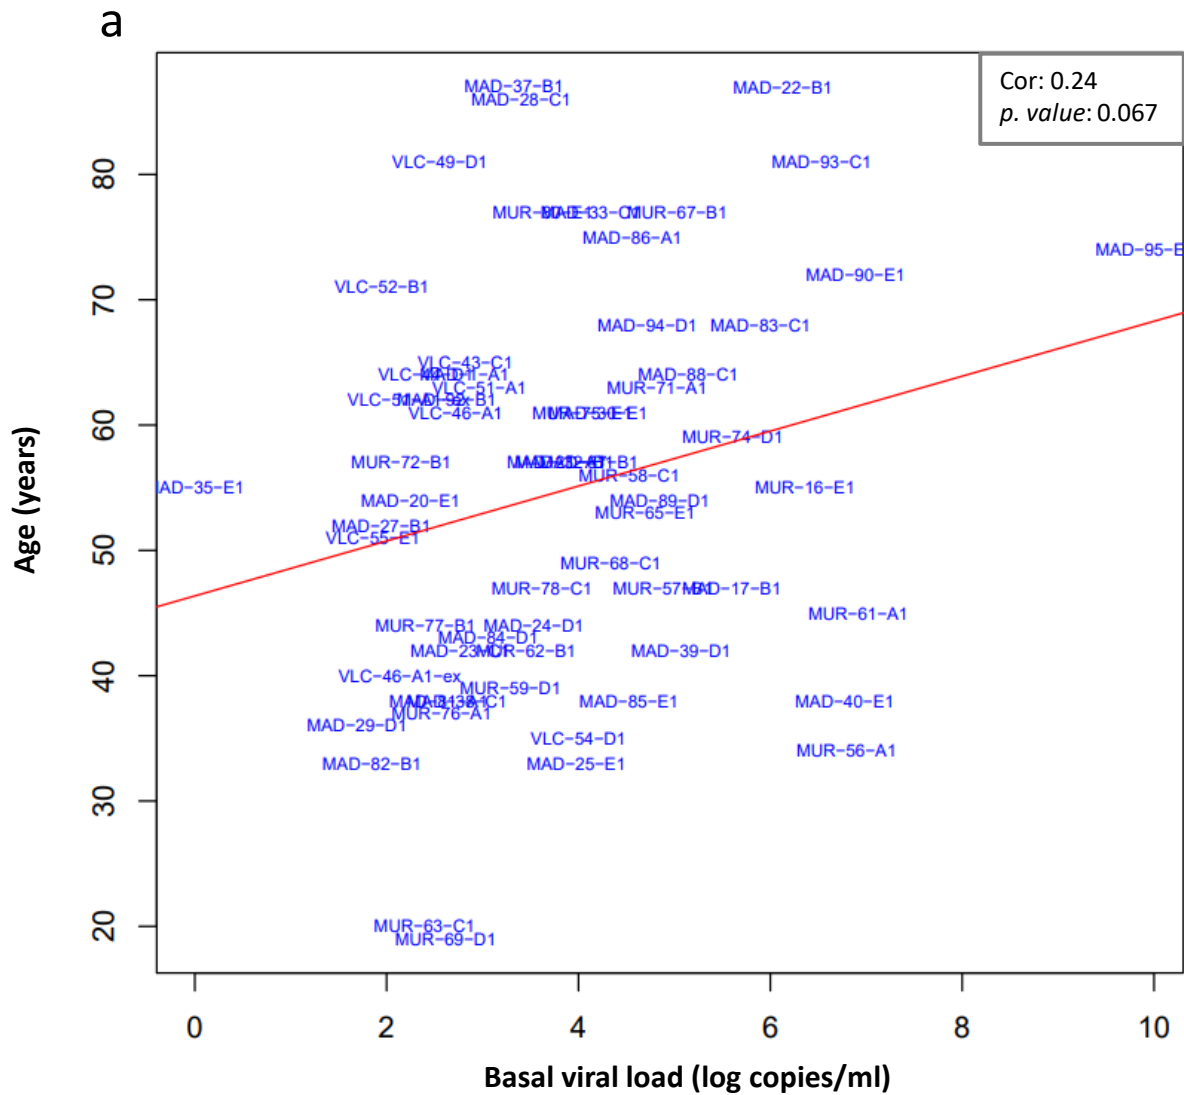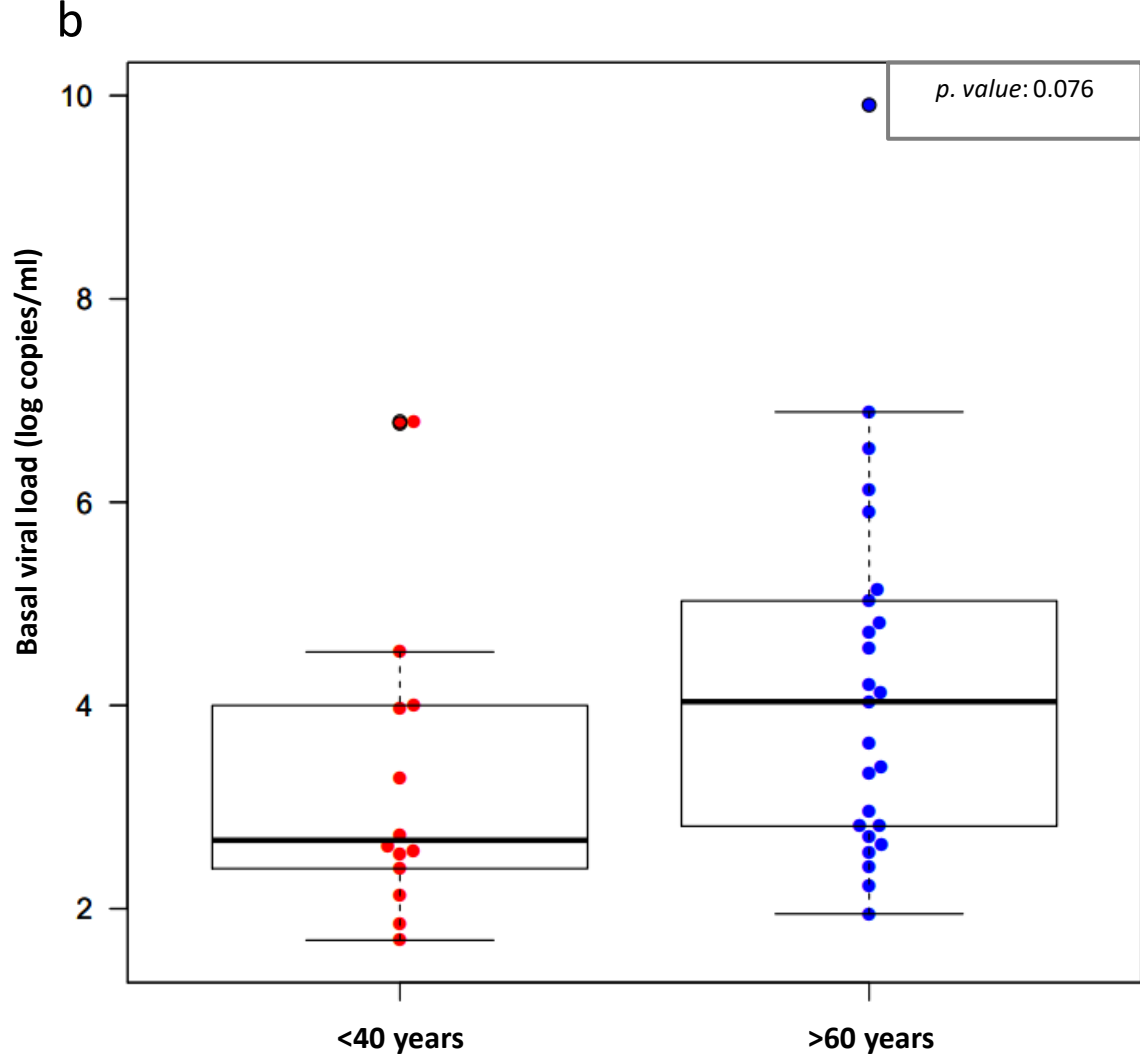

Supplement: 41598_2021_3461_MOESM1_ESM.pdf [file 41598_2021_3461_MOESM1_ESM.pdf]
