# Supplementary material for: Clinical evaluation of antiseptic mouth rinses to reduce salivary load of SARS-CoV-2
Source: PubMed Central journal article supplement (PMC8695582; doi:10.1038/s41598-021-03461-y), 2021-12-22
Supplement: 41598_2021_3461_MOESM2_ESM.pdf [file 41598_2021_3461_MOESM2_ESM.pdf]

**Supplementary Table 1. Individual salivary viral loads at each time point for the different mouthwash treatments (A: PVP-I, B: H<sub>2</sub>O<sub>2</sub>, C: CPC, D: CHX, E: Distilled water).** The four columns correspond to the viral loads at baseline, and at 15, 30 and 60 minutes post-mouthwash.

| <b>Patients A</b> | <b>Log copies/ml</b> | <b>Log copies/ml</b> | <b>Log copies/ml</b> | <b>Log copies/ml</b> |
|-------------------|----------------------|----------------------|----------------------|----------------------|
| MAD 21-A1         | 5,90E+03             | 1,18E+05             | 2,74E+06             | 3,29E+05             |
| MAD 81-A1         | 3,47E+02             | 2,69E+02             | 6,24E+01             | 1,07E+02             |
| MAD 86-A1         | 3,63E+04             | 5,27E+05             | 5,71E+05             | 5,14E+04             |
| MUR 61-A1         | 8,25E+06             | 8,89E+02             | 7,17E+04             | 1,52E+05             |
| MUR 71-A1         | 6,56E+04             | 4,75E+04             | 1,89E+04             | 1,64E+04             |
| MUR 76-A1         | 3,74E+02             | 2,78E+02             | 1,08E+04             | 2,61E+03             |
| VLC 46-A1         | 5,22E+02             | 4,92E+02             | 0,00E+00             | 7,53E+01             |
| VLC 46-A1 extra   | 1,37E+02             | 1,85E+02             | 0,00E+00             | 0,00E+00             |
| VLC 51-A1 extra   | 1,70E+02             | 0,00E+00             | 8,24E+02             | 0,00E+00             |
| <b>Patients B</b> | <b>Log copies/ml</b> | <b>Log copies/ml</b> | <b>Log copies/ml</b> | <b>Log copies/ml</b> |
| MAD 17-B1         | 3,94E+05             | 9,23E+04             | 8,07E+04             | 2,10E+04             |
| MAD 22-B1         | 1,35E+06             | 3,82E+04             | 4,41E+04             | 8,54E+03             |
| MAD 27-B1         | 8,76E+01             | 3,97E+03             | 0,00E+00             | 3,01E+03             |
| MAD 32-B1         | 7,16E+03             | 8,34E+03             | 2,47E+04             | 1,32E+05             |
| MAD 37-B1         | 2,12E+03             | 6,56E+01             | 1,09E+02             | 2,47E+02             |
| MAD 82-B1         | 7,01E+01             | 9,18E+02             | 1,00E+02             | 1,21E+02             |
| MAD 87-B1         | 1,28E+04             | 3,34E+05             | 1,22E+05             | 5,75E+03             |
| MAD 92-B1         | 4,22E+02             | 3,46E+02             | 3,79E+01             | 0,00E+00             |
| MUR 57-B1         | 7,57E+04             | 2,25E+04             | 5,90E+03             | 8,92E+05             |
| MUR 62-B1         | 2,84E+03             | 1,25E+03             | 3,97E+03             | 2,67E+02             |
| MUR 67-B1         | 1,07E+05             | 6,96E+07             | 1,67E+05             | 2,70E+05             |
| MUR 72-B1         | 1,42E+02             | 1,67E+02             | 0,00E+00             | 1,72E+02             |
| MUR 77-B1         | 2,53E+02             | 1,38E+02             | 7,97E+01             | 0,00E+00             |
| VLC 52-B1         | 8,90E+01             | 7,18E+01             | 6,67E+02             | 1,11E+02             |
| <b>Patients C</b> | <b>Log copies/ml</b> | <b>Log copies/ml</b> | <b>Log copies/ml</b> | <b>Log copies/ml</b> |
| MAD 23-C1         | 5,85E+02             | 7,03E+03             | 4,44E+02             | 2,58E+04             |
| MAD 28-C1         | 2,52E+03             | 7,27E+03             | 1,08E+04             | 3,48E+05             |
| MAD 33-C1         | 1,33E+04             | 1,54E+02             | 1,72E+06             | 3,46E+03             |
| MAD 38-C1-ok      | 5,41E+02             | 1,77E+03             | 9,62E+03             | 2,47E+04             |
| MAD 83-C1         | 7,91E+05             | 2,25E+04             | 5,22E+04             | 2,36E+02             |
| MAD 88-C1         | 1,39E+05             | 2,91E+03             | 6,04E+03             | 5,52E+03             |
| MUR 58-C1         | 3,38E+04             | 2,78E+04             | 3,15E+05             | 2,14E+03             |
| MUR 63-C1         | 2,48E+02             | 0,00E+00             | 0,00E+00             | 0,00E+00             |
| MUR 68-C1         | 2,17E+04             | 9,88E+03             | 1,16E+04             | 1,54E+04             |
| MUR 78-C1         | 4,16E+03             | 4,78E+03             | 8,77E+03             | 1,26E+05             |
| VLC 43-C1         | 6,60E+02             | 5,37E+03             | 0,00E+00             | 4,24E+03             |
| <b>Patients D</b> | <b>Log copies/ml</b> | <b>Log copies/ml</b> | <b>Log copies/ml</b> | <b>Log copies/ml</b> |
| MAD 24-D1         | 3,42E+03             | 1,61E+03             | 1,30E+04             | 4,99E+04             |
| MAD 29-D1         | 4,90E+01             | 4,25E+01             | 3,65E+01             | 0,00E+00             |
| MAD 39-D1         | 1,17E+05             | 1,92E+05             | 8,13E+04             | 4,01E+03             |
| MAD 84-D1         | 1,14E+03             | 2,24E+05             | 9,22E+03             | 1,35E+04             |
| MAD 89-D1         | 7,02E+04             | 2,31E+05             | 2,68E+03             | 2,11E+03             |
| MAD 94-D1         | 5,22E+04             | 1,76E+03             | 2,54E+02             | 7,90E+02             |
| MUR 59-D1         | 1,95E+03             | 2,50E+02             | 2,89E+02             | 1,01E+02             |

|           |          |          |          |          |
|-----------|----------|----------|----------|----------|
| MUR 69-D1 | 4,11E+02 | 1,66E+02 | 0,00E+00 | 5,15E+01 |
| MUR 74-D1 | 4,05E+05 | 9,26E+05 | 1,26E+06 | 2,97E+07 |
| VLC 44-D1 | 2,56E+02 | 2,45E+02 | 1,09E+03 | 2,88E+03 |
| VLC 49-D1 | 3,59E+02 | 5,46E+04 | 1,88E+03 | 7,44E+03 |
| VLC 54-D1 | 1,00E+04 | 7,05E+04 | 1,68E+04 | 2,44E+03 |

| <b>Patients E</b> | <b>Log copies/ml</b> | <b>Log copies/ml</b> | <b>Log copies/ml</b> | <b>Log copies/ml</b> |
|-------------------|----------------------|----------------------|----------------------|----------------------|
| MAD 20-E1         | 1,77E+02             | 3,27E+01             | 2,01E+04             | 4,26E+03             |
| MAD 25-E1         | 9,47E+03             | 2,45E+05             | 0,00E+00             | 1,57E+03             |
| MAD 30-E1         | 1,60E+04             | 1,16E+02             | 1,62E+02             | 1,25E+03             |
| MAD 35-E1         | 0,00E+00             | 2,33E+02             | 4,20E+02             | 5,97E+01             |
| MAD 40-E1         | 5,96E+06             | 1,94E+06             | 2,42E+07             | 6,85E+07             |
| MAD 85-E1         | 3,36E+04             | 2,18E+04             | 2,64E+03             | 2,93E+03             |
| MAD 90-E1         | 7,72E+06             | 1,11E+08             | 2,37E+07             | 5,94E+06             |
| MAD 95-E1         | 8,09E+09             | 8,97E+07             | 7,95E+08             | 3,59E+03             |
| MUR 16-E1-EXTRA   | 2,29E+06             | 1,67E+06             | 3,91E+05             | 2,93E+05             |
| MUR 75-E1         | 1,09E+04             | 7,14E+05             | 1,41E+06             | 2,37E+02             |
| MUR 80-E1         | 4,22E+03             | 3,67E+05             | 2,34E+05             | 1,12E+06             |
| VLC 55-E1         | 7,21E+01             | 8,20E+01             | 4,28E+02             | 3,22E+02             |
